# Supplementary material for: How Effective Are the Protected Areas of the Natura 2000 Network in Halting Biological Invasions? A Case Study in Greece
Source: MDPI journal article supplement (doi:10.3390/plants10102113), 2021-10-05
Supplement: s1 [file s1]

## Supplementary Material

**Table S1.** Alien plant taxa recorded during the last 15 years in the 159 Natura 2000 sites under study. Nomenclature follows Dimopoulos et al. [72,73] and the web-based platform “Flora of Greece web: Vascular Plants of Greece An Annotated Checklist”[109]. In column Arch /Neo archaeophytes are indicated with Arch and neophytes with Neo. In column Invasiveness invasive species are indicated with I and non-invasive with N. Information for the three last columns is derived from Dimopoulos et al. [42] and the web-based platform “Alien Plants in Greece: A web-based platform [97].

| a/a | Taxon                                                       | Family         | Status          | Arch /Neo | Invasiveness |
|-----|-------------------------------------------------------------|----------------|-----------------|-----------|--------------|
| 1   | <i>Carpobrotus edulis</i> (L.) N.E. Br.                     | Aizoaceae      | Established     | Neo       | I            |
| 2   | <i>Tetragonia tetragonoides</i> (Pall.) Kuntze              | Aizoaceae      | Established     | Neo       | N            |
| 3   | <i>Amaranthus albus</i> L.                                  | Amaranthaceae  | Established     | Neo       | I            |
| 4   | <i>Amaranthus blitoides</i> S. Watson                       | Amaranthaceae  | Established     | Neo       | I            |
| 5   | <i>Amaranthus hybridus</i> L.                               | Amaranthaceae  | Established     | Neo       | I            |
| 6   | <i>Amaranthus hypochondriacus</i> L.                        | Amaranthaceae  | Established     | Neo       | N            |
| 7   | <i>Amaranthus retroflexus</i> L.                            | Amaranthaceae  | Established     | Neo       | I            |
| 8   | <i>Amaranthus</i> sp.                                       | Amaranthaceae  | -               | -         | -            |
| 9   | <i>Coriandrum sativum</i> L.                                | Apiaceae       | Established     | Arch      | N            |
| 10  | <i>Daucus carota</i> subsp. <i>sativus</i> (Hoffm.) Arcang. | Apiaceae       | Non-established | Neo       | N            |
| 11  | <i>Zantedeschia aethiopica</i> (L.) Spreng.                 | Araceae        | Established     | Neo       | I            |
| 12  | <i>Agave americana</i> L.                                   | Asparagaceae   | Established     | Neo       | I            |
| 13  | <i>Hyacinthus orientalis</i> L.                             | Asparagaceae   | Non-established | Neo       | N            |
| 14  | <i>Ageratina adenophora</i> (Spreng.) King & H. Rob.        | Asteraceae     | Established     | Neo       | N            |
| 15  | <i>Cotula coronopifolia</i> L.                              | Asteraceae     | Established     | Neo       | I            |
| 16  | <i>Cynara scolymus</i> L.                                   | Asteraceae     | Non-established | Arch      | N            |
| 17  | <i>Erigeron bonariensis</i> L.                              | Asteraceae     | Established     | Neo       | I            |
| 18  | <i>Erigeron canadensis</i> L.                               | Asteraceae     | Established     | Neo       | I            |
| 19  | <i>Erigeron</i> sp.                                         | Asteraceae     | -               | -         | -            |
| 20  | <i>Erigeron sumatrensis</i> Retz.                           | Asteraceae     | Established     | Neo       | I            |
| 21  | <i>Symphytotrichum squamatum</i> (Spreng.) G.L. Nesom       | Asteraceae     | Established     | Neo       | I            |
| 22  | <i>Xanthium spinosum</i> L.                                 | Asteraceae     | Established     | Neo       | I            |
| 23  | <i>Azolla filiculoides</i> Lam.                             | Azollaceae     | Established     | Neo       | I            |
| 24  | <i>Opuntia ficus-indica</i> (L.) Mill.                      | Cactaceae      | Established     | Neo       | I            |
| 25  | <i>Opuntia humifusa</i> (Raf.) Raf.                         | Cactaceae      | Established     | Neo       | I            |
| 26  | <i>Opuntia</i> sp.                                          | Cactaceae      | -               | Neo       | -            |
| 27  | <i>Beta vulgaris</i> L. subsp. <i>vulgaris</i>              | Chenopodiaceae | Non-established | Neo       | N            |
| 28  | <i>Chenopodium giganteum</i> D. Don                         | Chenopodiaceae | Established     | Neo       | N            |
| 29  | <i>Dysphania ambrosioides</i> (L.) Mosyakin & Clemants      | Chenopodiaceae | Established     | Neo       | I            |

| a/a | Taxon                                                                   | Family         | Status              | Arch /Neo | Invasi-<br>veness |
|-----|-------------------------------------------------------------------------|----------------|---------------------|-----------|-------------------|
| 30  | <i>Dysphania multifida</i> (L.) Mosyakin & Clemants                     | Chenopodiaceae | Established         | Neo       | I                 |
| 31  | <i>Cuscuta campestris</i> Yunck.                                        | Convolvulaceae | Established         | Neo       | I                 |
| 32  | <i>Elaeagnus angustifolia</i> L.                                        | Elaeagnaceae   | Established         | Neo       | I                 |
| 33  | <i>Ricinus communis</i> L.                                              | Euphorbiaceae  | Established         | Arch      | I                 |
| 34  | <i>Acacia saligna</i> (Labill.) Wendl.                                  | Fabaceae       | Established         | Neo       | I                 |
| 35  | <i>Acacia</i> sp.                                                       | Fabaceae       | -                   | -         | -                 |
| 36  | <i>Amorpha fruticosa</i> L.                                             | Fabaceae       | Established         | Neo       | N                 |
| 37  | <i>Caesalpinia gilliesii</i> (Hook.) D.Dietr.                           | Fabaceae       | Non-<br>established | Neo       | N                 |
| 38  | <i>Gleditsia triacanthos</i> L.                                         | Fabaceae       | Non-<br>established | Neo       | N                 |
| 39  | <i>Lathyrus sativus</i> L.                                              | Fabaceae       | Established         | Arch      | N                 |
| 40  | <i>Medicago sativa</i> subsp. <i>microcarpa</i> Urb.                    | Fabaceae       | Non-<br>established | Neo       | N                 |
| 41  | <i>Retama monosperma</i> (L.) Boiss.                                    | Fabaceae       | Established         | Neo       | N                 |
| 42  | <i>Robinia pseudoacacia</i> L.                                          | Fabaceae       | Established         | Neo       | I                 |
| 43  | <i>Trigonella caerulea</i> (L.) Ser.                                    | Fabaceae       | -                   | Neo       | N                 |
| 44  | <i>Morus alba</i> L.                                                    | Moraceae       | Established         | Arch      | N                 |
| 45  | <i>Morus</i> sp.                                                        | Moraceae       | -                   | -         | -                 |
| 46  | <i>Eucalyptus camaldulensis</i> Dehnh.                                  | Myrtaceae      | Established         | Neo       | N                 |
| 47  | <i>Oxalis debilis</i> Kunth                                             | Oxalidaceae    | Established         | Neo       | I                 |
| 48  | <i>Oxalis pes-caprae</i> L.                                             | Oxalidaceae    | Established         | Neo       | I                 |
| 49  | <i>Phytolacca americana</i> L.                                          | Phytolocaceae  | Established         | Neo       | I                 |
| 50  | <i>Arundo donax</i> L.                                                  | Poaceae        | Established         | Arch      | N                 |
| 51  | <i>Bromus rubens</i> subsp. <i>kunkelii</i> (H. Scholz) H. Scholz       | Poaceae        | Non-<br>established | Neo       | N                 |
| 52  | <i>Echinochloa crus-galli</i> subsp. <i>hispidula</i> (Retz.) Honda     | Poaceae        | Established         | Neo       | N                 |
| 53  | <i>Echinochloa crus-galli</i> subsp. <i>spiralis</i> (Vasinger) Tzvelev | Poaceae        | Established         | Neo       | N                 |
| 54  | <i>Eleusine indica</i> (L.) Gaertn.                                     | Poaceae        | Established         | Neo       | I                 |
| 55  | <i>Hordeum vulgare</i> subsp. <i>distichon</i> (L.) Körn.               | Poaceae        | Non-<br>established | Arch      | N                 |
| 56  | <i>Paspalum dilatatum</i> Poir.                                         | Poaceae        | Established         | Neo       | I                 |
| 57  | <i>Paspalum distichum</i> L.                                            | Poaceae        | Established         | Neo       | I                 |
| 58  | <i>Sporobolus indicus</i> (L.) R.Br.                                    | Poaceae        | Established         | Neo       | N                 |
| 59  | <i>Stenotaphrum secundatum</i> (Walter) Kuntze                          | Poaceae        | Established         | Neo       | N                 |
| 60  | <i>Triticum aestivum</i> L.                                             | Poaceae        | Non-<br>established | Neo       | N                 |
| 61  | <i>Triticum</i> sp.                                                     | Poaceae        | Non-<br>established | Neo       | N                 |
| 62  | <i>Malus domestica</i> Borkh.                                           | Rosaceae       | Non-<br>established | Arch      | N                 |
| 63  | <i>Prunus cerasus</i> L.                                                | Rosaceae       | Established         | Arch      | N                 |

| a/a | Taxon                                                   | Family           | Status              | Arch /Neo | Invasi-<br>veness |
|-----|---------------------------------------------------------|------------------|---------------------|-----------|-------------------|
| 64  | <i>Prunus dulcis</i> (Mill.) D.A.Webb                   | Rosaceae         | Established         | Arch      | N                 |
| 65  | <i>Populus x canadensis</i> Moench                      | Salicaceae       | Non-<br>established | Neo       | N                 |
| 66  | <i>Cymbalaria muralis</i> G. Gaertn., B. Mey. & Scherb. | Scrophulariaceae | Established         | Arch      | I                 |
| 67  | <i>Ailanthus altissima</i> (Mill.) Swingle              | Simaroubaceae    | Established         | Neo       | I                 |
| 68  | <i>Datura inoxia</i> P. Mill.                           | Solanaceae       | Established         | Neo       | N                 |
| 69  | <i>Datura stramonium</i> L.                             | Solanaceae       | Established         | Neo       | I                 |
| 70  | <i>Nicotiana glauca</i> Graham                          | Solanaceae       | Established         | Neo       | I                 |
| 71  | <i>Solanum elaeagnifolium</i> Cav.                      | Solanaceae       | Established         | Neo       | I                 |
| 72  | <i>Tamarix arborea</i> B.R. Baum                        | Tamaricaceae     | Established         | Neo       | N                 |
| 73  | <i>Tropaeolum majus</i> L.                              | Tropaeolaceae    | Established         | Neo       | N                 |

**Table S2.** Habitat types (names and codes) included in each habitat group.

| Habitat group      | Natura 2000 code | Habitat type name                                                                                                                                                                                          |
|--------------------|------------------|------------------------------------------------------------------------------------------------------------------------------------------------------------------------------------------------------------|
| Riparian - wetland | 3130             | Oligotrophic to mesotrophic standing waters with vegetation of the <i>Littorelletea uniflorae</i> and/or Isoeto Nanojuncetea                                                                               |
|                    | 3150             | Natural eutrophic lakes with <i>Magnopotamion</i> or <i>Hydrocharition</i> - type vegetation                                                                                                               |
|                    | 3170             | *Mediterranean temporary ponds                                                                                                                                                                             |
|                    | 3240             | Alpine rivers and their ligneous vegetation with <i>Salix elaeagnos</i>                                                                                                                                    |
|                    | 3250             | Constantly flowing Mediterranean rivers with <i>Glaucium flavum</i>                                                                                                                                        |
|                    | 3280             | Constantly flowing Mediterranean rivers with <i>PaspaloAgrostidion</i> species and hanging curtains of <i>Salix</i> and <i>Populus alba</i>                                                                |
|                    | 3290             | Intermittently flowing Mediterranean rivers of the <i>Paspalo-Agrostidion</i>                                                                                                                              |
|                    | 72A0             | Reed thickets                                                                                                                                                                                              |
|                    | 72B0             | Societies high reeds                                                                                                                                                                                       |
|                    | 7210             | *Calcareous fens with <i>Cladium mariscus</i> and species of the <i>Caricion davallianae</i>                                                                                                               |
|                    | 91E0             | *Alluvial forests with <i>Alnus glutinosa</i> and <i>Fraxinus excelsior</i> ( <i>Alno-Padion</i> , <i>Alnion incanae</i> , <i>Salicion albae</i> )                                                         |
|                    | 91F0             | Riparian mixed forests of <i>Quercus robur</i> , <i>Ulmus laevis</i> and <i>Ulmus minor</i> , <i>Fraxinus excelsior</i> or <i>Fraxinus angustifolia</i> , along the great rivers ( <i>Ulmion minoris</i> ) |
|                    | 92A0             | <i>Salix alba</i> and <i>Populus alba</i> galleries                                                                                                                                                        |
|                    | 92C0             | <i>Platanus orientalis</i> and <i>Liquidambar orientalis</i> woods ( <i>Plantanion orientalis</i> )                                                                                                        |
|                    | 92D0             | Southern riparian galleries and thickets ( <i>NerioTamaricetea</i> and <i>Securinegion tinctoriae</i> )                                                                                                    |
| Coastal            | 1210             | Annual vegetation of drift lines                                                                                                                                                                           |
|                    | 1240             | Vegetated sea cliffs of the Mediterranean coasts with endemic <i>Limonium</i> spp.                                                                                                                         |
|                    | 1410             | Mediterranean salt meadows ( <i>Juncetalia maritimi</i> )                                                                                                                                                  |
|                    | 1420             | Mediterranean and thermo-Atlantic halophilous scrubs ( <i>Sarcocornetea fruticosi</i> )                                                                                                                    |
|                    | 2110             | Embryonic shifting dunes                                                                                                                                                                                   |
|                    | 2120             | Shifting dunes along the shoreline with <i>Ammophila arenaria</i> (white dunes)                                                                                                                            |
|                    | 2190             | Humid dune slacks                                                                                                                                                                                          |
|                    | 2220             | Dunes with <i>Euphorbia terracina</i>                                                                                                                                                                      |
|                    | 2230             | <i>Malcolmietalia</i> dune grasslands                                                                                                                                                                      |
|                    | 2250             | *Coastal dunes with <i>Juniperus</i> spp.                                                                                                                                                                  |
|                    | 2260             | <i>Cisto-Lavenduletalia</i> dune sclerophyllous scrubs                                                                                                                                                     |
|                    | 2270             | *Wooded dunes with <i>Pinus pinea</i> and/or <i>Pinus pinaster</i>                                                                                                                                         |
| Forest             | 9130             | <i>Asperulo-Fagetum</i> beech forests                                                                                                                                                                      |
|                    | 9250             | <i>Quercus trojana</i> woods                                                                                                                                                                               |
|                    | 9260             | <i>Castanea sativa</i> woods                                                                                                                                                                               |
|                    | 9280             | <i>Quercus frainetto</i> woods                                                                                                                                                                             |

| Habitat group | Natura 2000 code | Habitat type name                                                               |
|---------------|------------------|---------------------------------------------------------------------------------|
|               | 9290             | <i>Cupressus</i> forests ( <i>Acero-Cupression</i> )                            |
|               | 9310             | Aegean <i>Quercus brachyphylla</i> forests                                      |
|               | 9320             | <i>Olea</i> and <i>Ceratonia</i> forests                                        |
|               | 9350             | <i>Quercus macrolepis</i> forests                                               |
|               | 9370             | *Palm groves of <i>Phoenix</i>                                                  |
|               | 9540             | Mediterranean pine forests with endemic <i>Mesogean</i> pines                   |
|               | 91M0             | Pannonian-Balkan turkey oak- sessile oak forests                                |
|               | 925A             | <i>Ostrya</i> , <i>Carpinus</i> and mixed thermophilous forests                 |
|               | 934A             | Greek <i>Quercus coccifera</i> woods                                            |
| Grassland     | 6220             | *Pseudo-steppe with grasses and annuals of the <i>Thero-Brachypodietea</i>      |
|               | 6290             | Mediterranean subnitrophilous grasslands                                        |
|               | 6420             | Mediterranean tall humid herb grasslands of the <i>Molinio-Holoschoenion</i>    |
|               | 62A0             | Eastern sub-mediterranean dry grasslands ( <i>Scorzoneratalia villosae</i> )    |
| Rock          | 8140             | Eastern Mediterranean screes                                                    |
|               | 8210             | Calcareous rocky slopes with chasmophytic vegetation                            |
|               | 8220             | Siliceous rocky slopes with chasmophytic vegetation                             |
| Shrubland     | 4090             | Endemic oro-Mediterranean heaths with gorse                                     |
|               | 5160             | South-eastern submediterranean deciduous thickets ( <i>Prunion fruticosae</i> ) |
|               | 5210             | Arborescent matorral with <i>Juniperus</i> spp.                                 |
|               | 5330             | Thermo-Mediterranean and pre-desert scrub                                       |
|               | 5340             | Garrigues of Eastern Mediterranean                                              |
|               | 5350             | Pseudomaquis                                                                    |
|               | 5420             | <i>Sarcopoterium spinosum</i> phryganas                                         |

**Table S3.** Invasive alien plant species recorded in the Natura 2000 sites under study and invaded habitat groups.

| Species                        | Number of Natura 2000 sites with presence of each taxon | Invaded habitat groups                        |
|--------------------------------|---------------------------------------------------------|-----------------------------------------------|
| <i>Carpobrotus edulis</i>      | 9                                                       | coastal, riparian                             |
| <i>Amaranthus albus</i>        | 3                                                       | grasslands, riparian, shrublands              |
| <i>Amaranthus blitoides</i>    | 3                                                       | coastal, riparian                             |
| <i>Amaranthus hybridus</i>     | 3                                                       | coastal, riparian                             |
| <i>Amaranthus retroflexus</i>  | 4                                                       | forests, riparian                             |
| <i>Zantedeschia aethiopica</i> | 1                                                       | grasslands, riparian                          |
| <i>Agave americana</i>         | 8                                                       | coastal, forests, riparian, shrublands        |
| <i>Cotula coronopifolia</i>    | 1                                                       | coastal, riparian                             |
| <i>Erigeron bonariensis</i>    | 6                                                       | forests, grasslands, riparian, shrublands     |
| <i>Erigeron canadensis</i>     | 10                                                      | coastal, grasslands, riparian, shrublands     |
| <i>Erigeron sumatrensis</i>    | 6                                                       | coastal, grasslands, riparian                 |
| <i>Symphotrichum squamatum</i> | 5                                                       | coastal, forests, grasslands, riparian        |
| <i>Xanthium spinosum</i>       | 8                                                       | coastal, grasslands, riparian                 |
| <i>Opuntia ficus-indica</i>    | 5                                                       | coastal, forests, riparian, rocky, shrublands |
| <i>Opuntia humifusa</i>        | 1                                                       | rocky                                         |

| Species                       | Number of Natura 2000<br>sites with presence of each<br>taxon | Invaded habitat groups                                       |
|-------------------------------|---------------------------------------------------------------|--------------------------------------------------------------|
| <i>Dysphania ambrosioides</i> | 4                                                             | coastal, grasslands, riparian                                |
| <i>Dysphania multifida</i>    | 1                                                             | grasslands                                                   |
| <i>Cuscuta campestris</i>     | 1                                                             | grasslands, riparian                                         |
| <i>Elaeagnus angustifolia</i> | 1                                                             | riparian                                                     |
| <i>Ricinus communis</i>       | 1                                                             | shrublands                                                   |
| <i>Acacia saligna</i>         | 1                                                             | coastal, riparian                                            |
| <i>Robinia pseudoacacia</i>   | 7                                                             | forests, riparian                                            |
| <i>Oxalis debilis</i>         | 1                                                             | coastal                                                      |
| <i>Oxalis pes-caprae</i>      | 41                                                            | coastal, forests, grasslands, riparian, rocky,<br>shrublands |
| <i>Phytolacca americana</i>   | 2                                                             | riparian                                                     |
| <i>Cymbalaria muralis</i>     | 4                                                             | forests, riparian, rocky                                     |
| <i>Eleusine indica</i>        | 1                                                             | riparian                                                     |
| <i>Paspalum dilatatum</i>     | 1                                                             | riparian                                                     |
| <i>Paspalum distichum</i>     | 15                                                            | grasslands, riparian                                         |
| <i>Azolla filiculoides</i>    | 1                                                             | riparian                                                     |
| <i>Ailanthus altissima</i>    | 9                                                             | forests, riparian, rocky, shrublands                         |
| <i>Datura stramonium</i>      | 1                                                             | riparian                                                     |
| <i>Nicotiana glauca</i>       | 2                                                             | riparian, shrublands                                         |
| <i>Solanum elaeagnifolium</i> | 3                                                             | coastal                                                      |

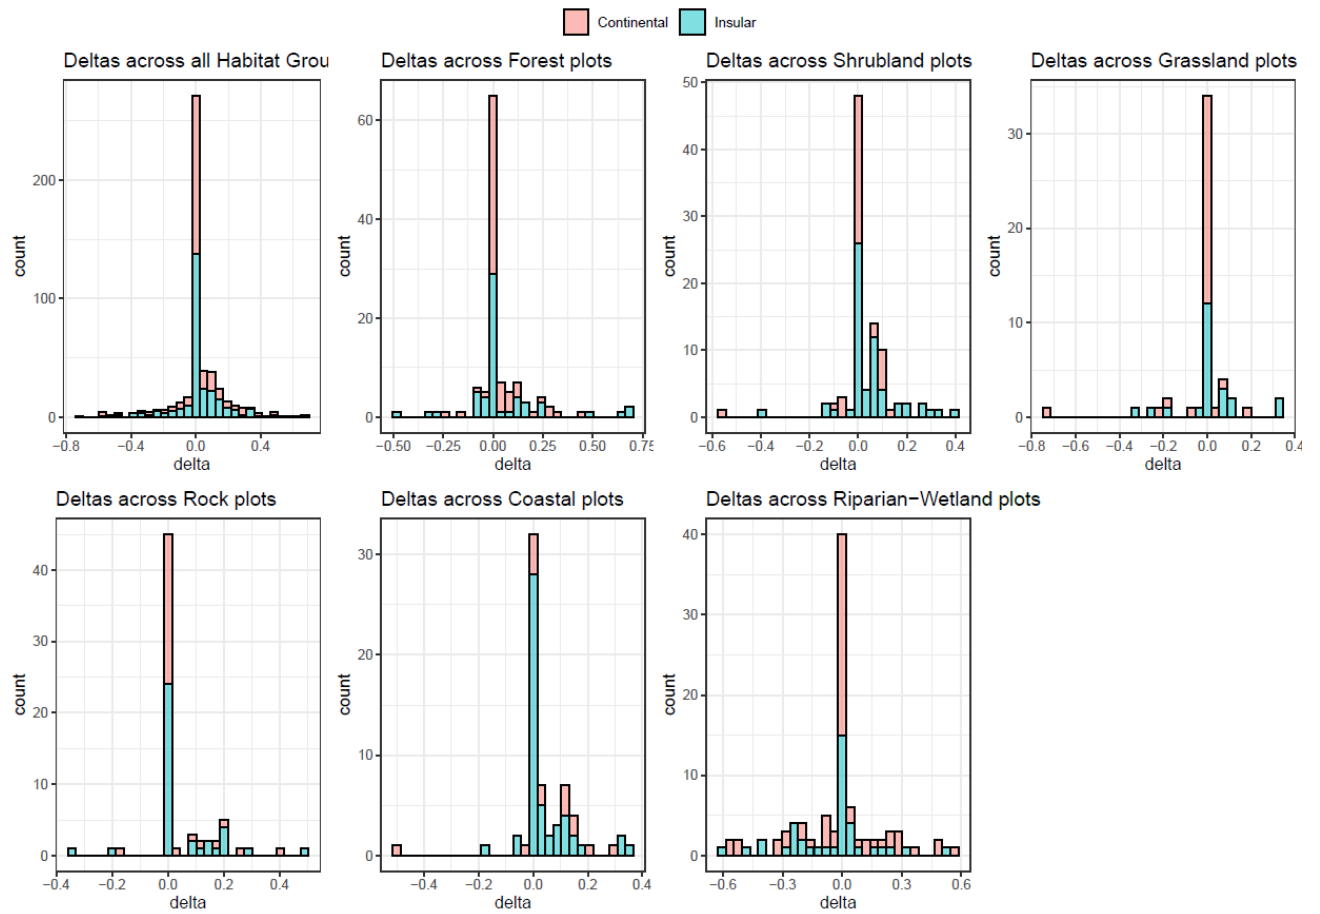

**Figure S1.** Histograms of delta (difference in the ratio of invaded plots between the two study periods) for insular (light blue) and continental (pink) Natura 2000 sites for all plots and per habitat group.
